# Supplementary material for: pH-responsive hyaluronic acid- co -poly(acrylic acid) hydrogel scaffolds for modified release of mesalamine; characterization and biosafety evaluation
Source: Royal Society of Chemistry journal article supplement (doi:10.1039/d5ra08622a), 2026-01-01
Supplement: d5ra08622a1.pdf [file d5ra08622a1.pdf]

**pH-responsive hyaluronic acid-co-poly (acrylic acid) hydrogel scaffolds for modified release of mesalamine; characterization and biosafety evaluation**

Huma Liaqat<sup>1</sup>, Muhammad Usman Minhas<sup>2</sup>, Syed Faisal Badshah<sup>3\*</sup>, Kashif Barkat<sup>1,4</sup>, Samiullah Khan<sup>5</sup>, Shivani Chopra<sup>6</sup>, Hitesh Chopra<sup>7</sup>, Esmael M. Alyami<sup>8</sup>, Amira Metouekel<sup>9</sup>, Atrsaw Asrat Mengistie<sup>10\*</sup>, Gehan M. Elossaily<sup>12,13</sup>, Mudassar Shahid<sup>11</sup>

<sup>1</sup> Faculty of Pharmacy, The University of Lahore, Lahore, Pakistan.  
[pharmacisthuma123@gmail.com](mailto:pharmacisthuma123@gmail.com), [kashif.barkat@pharm.uol.edu.pk](mailto:kashif.barkat@pharm.uol.edu.pk)

<sup>2</sup> College of Pharmacy, University of Sargodha, Sargodha, Pakistan. [us.minhas@hotmail.com](mailto:us.minhas@hotmail.com)

<sup>3</sup> Faculty of Medical and Health Sciences, Department of Pharmacy, University of Poonch Rawalakot, Azad Jammu and Kashmir, Pakistan. [faisal.badshah@upr.edu.pk](mailto:faisal.badshah@upr.edu.pk)

<sup>4</sup> Faculty of Health Sciences, Equator University of Science and Technology, Masaka City, Uganda.

<sup>5</sup> College of Pharmacy, Margalla Institute of Health Sciences, Islamabad, Pakistan.  
[sami\\_pharmacist99@hotmail.com](mailto:sami_pharmacist99@hotmail.com)

<sup>6</sup> Department of Biosciences, Saveetha School of Engineering, Saveetha Institute of Medical and Technical Sciences, Chennai - 602105, Tamil Nadu, India. [shanuvashisht2730@gmail.com](mailto:shanuvashisht2730@gmail.com)

<sup>7</sup> Centre for Research Impact & Outcome, Chitkara College of Pharmacy, Chitkara University, Rajpura, 140401, Punjab, India. [chopraontheride@gmail.com](mailto:chopraontheride@gmail.com)

<sup>8</sup> Department of Biology, College of Science, King Khalid University, PO Box 960, Asir, Abha, 61421, Saudi Arabia. [ealshahi@kku.edu.sa](mailto:ealshahi@kku.edu.sa)

<sup>9</sup> University of Technology of Compiègne, EA 4297 TIMR, 60205 Compiègne Cedex, France.  
[amira.m@bioval-oi.com](mailto:amira.m@bioval-oi.com)

<sup>10</sup> Department of Biology, Bahir Dar University, P.O.Box 79, Bahir Dar, Ethiopia.  
[Atrsawresearcher@gmail.com](mailto:Atrsawresearcher@gmail.com)

<sup>11</sup> Department of Pharmaceutics, College of Pharmacy, King Saud University Saudi Arabia.  
[mahmad1@ksu.edu.sa](mailto:mahmad1@ksu.edu.sa)

<sup>12</sup> Department of Basic Medical Sciences, College of Medicine, AlMaarefa University, Diriyah, 13713, Riyadh, Saudi Arabia. [jabdelmenam@um.edu.sa](mailto:jabdelmenam@um.edu.sa)

<sup>13</sup> Research Center, Deanship of Scientific Research and Post-Graduate Studies, AlMaarefa University, Diriyah, 13713, Riyadh, Saudi Arabia.

\* Correspondence: [faisal.badshah@upr.edu.pk](mailto:faisal.badshah@upr.edu.pk) (SFB); [Atrsawresearcher@gmail.com](mailto:Atrsawresearcher@gmail.com) (AAM)

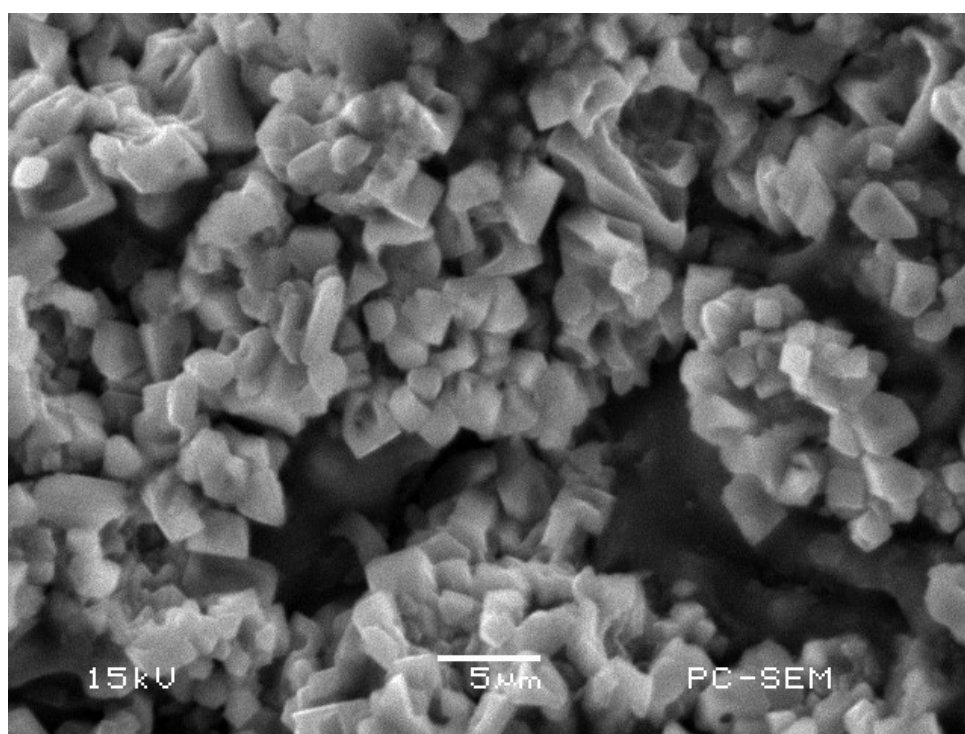

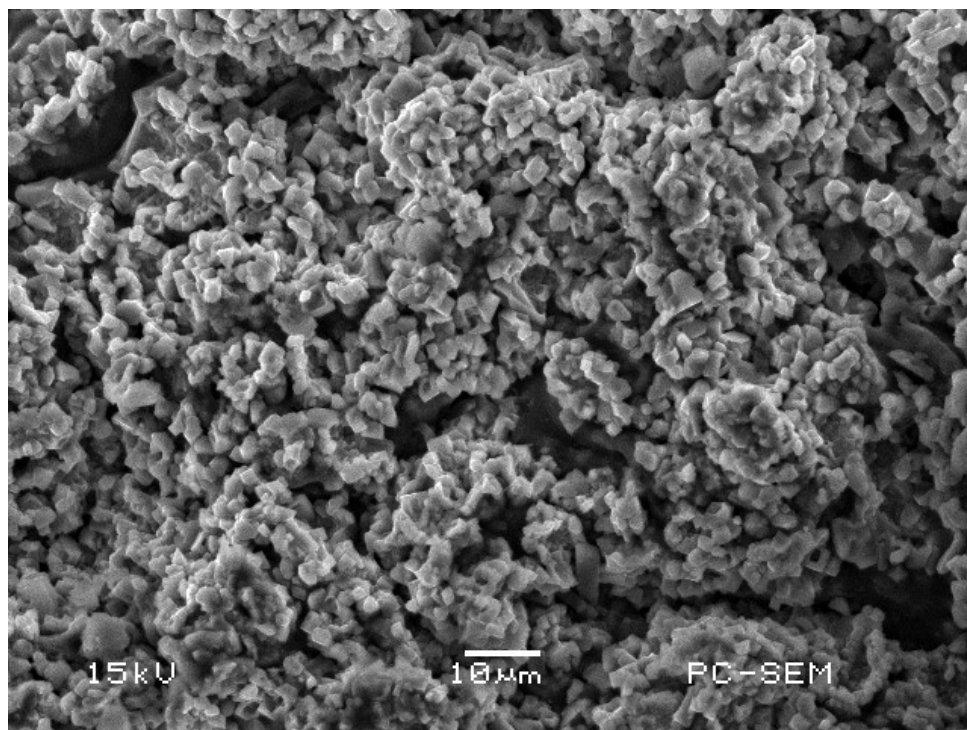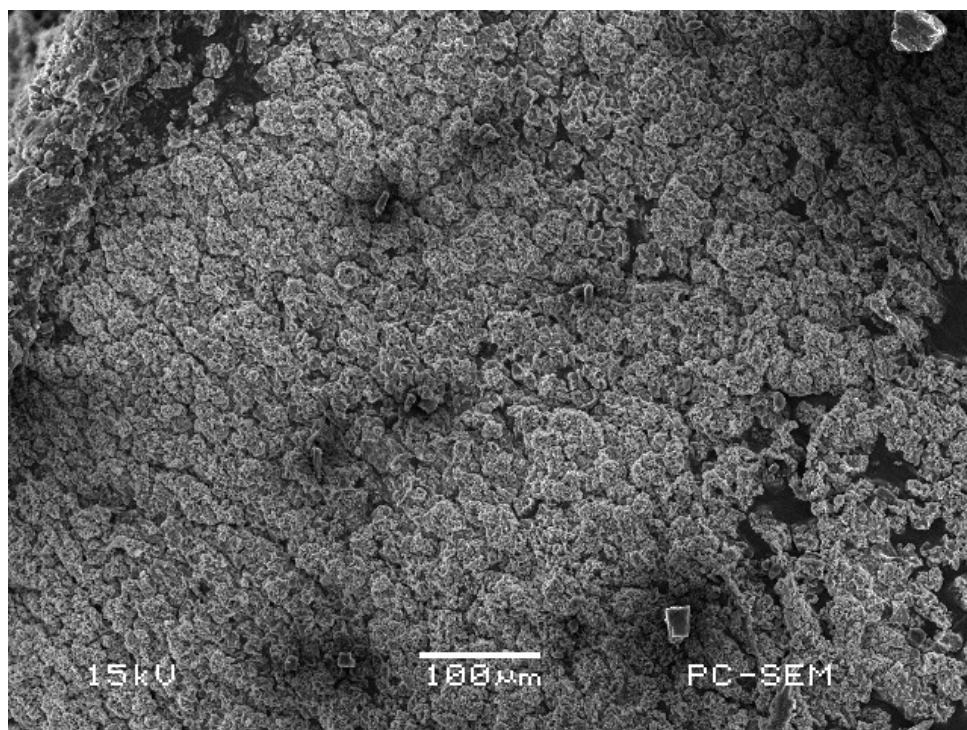

**Figure S1.** Surface morphology of drug-loaded hydrogel discs captured through SEM at varying magnifications (5 μm, 10 μm, and 100 μm), illustrating the structural architecture and porosity across different scales.
